# Supplementary material for: The effects of inhaling hydrogen gas on macrophage polarization, fibrosis, and lung function in mice with bleomycin-induced lung injury
Source: Springer Nature journal article supplement (doi:10.1186/s12890-021-01712-2), 2021-10-31
Supplement: MOESM1 [file 19816120]

# Supplementary Figure 1

(a)

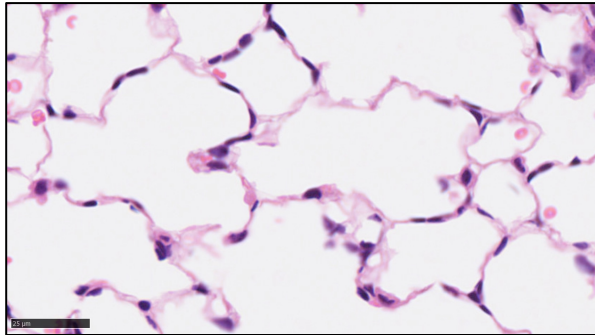

Scale bar 25  $\mu$ m

(b)

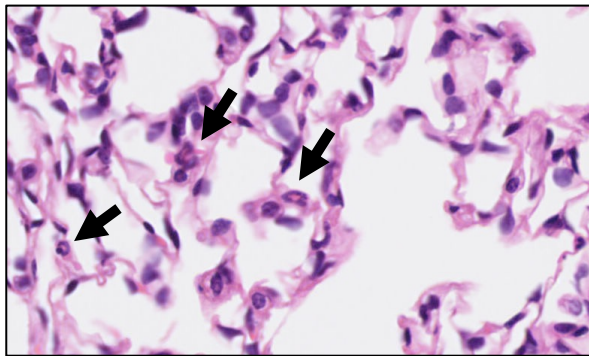

(c)

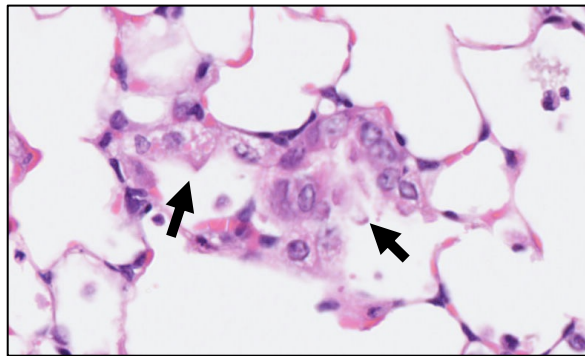

(d)

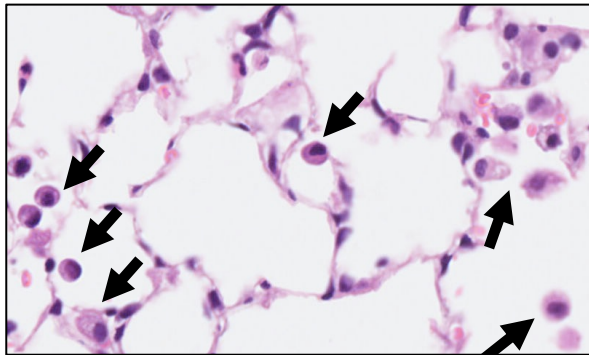

(e)

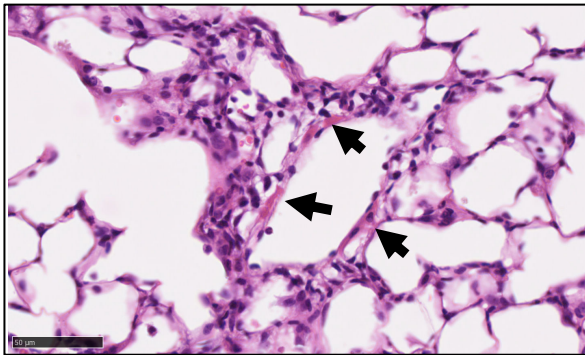

Scale bar 50  $\mu$ m

Time course of histological changes in the Lung Injury model created by intratracheal bleomycin at 1mg/kg. (a) Normal lung tissue section, HE stain. (magnification x400). (b) Lung tissue HE stain on day 2 after intratracheal bleomycin administration. The alveolar interstitium are thickened, and there is neutrophilic infiltration (arrows) in the alveoli and interstitium (magnification x400). The number of neutrophil is less than bacterial pneumonia. (c) HE stained image on day 4 after bleomycin administration. Interstitial edema is reduced. Protein-rich debris with cells can be seen in the alveoli (arrow) (magnification x400). (d) HE stained image on day 7 after bleomycin administration. The immune cells in the alveoli are mainly macrophages (arrow) (magnification x400). (e) Day 7. Hyaline membrane formation is observed (arrows) (magnification x200).

# Supplementary Figure 1

(f)

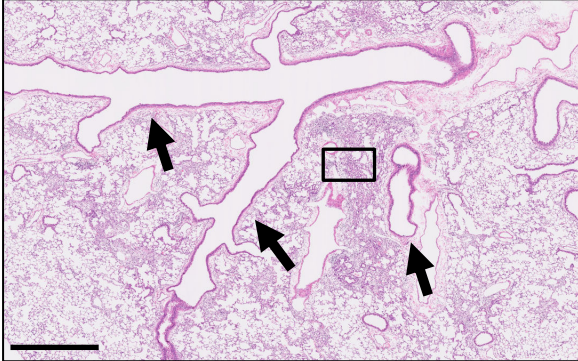

Scale bar 1 mm

(g)

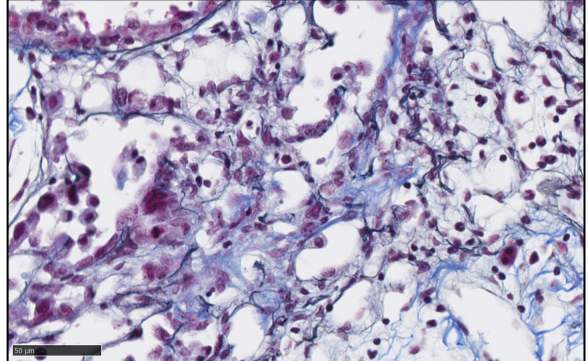

Scale bar 50 μm

(h)

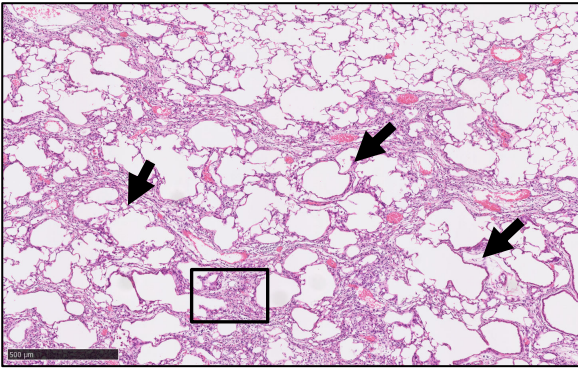

Scale bar 500 μm

(i)

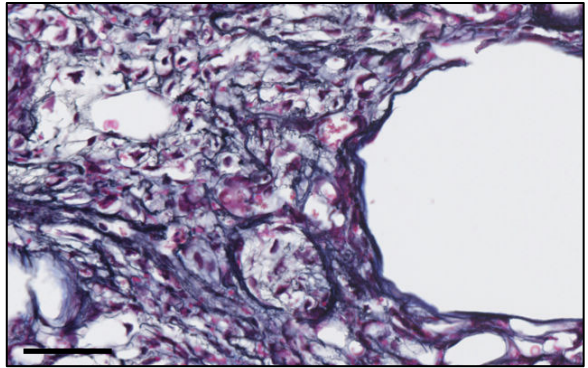

Scale bar 50 μm

(f) On day 21, HE staining (x20). Traction bronchiectasis is seen (arrow).

(g) Inside the left rectangle, Elastic Masson stain (x200). Extracellular matrix hyperplasia (blue) is seen in the alveolar interstitium.

(h) On day 35, HE stain (x40). Destruction of alveolar structures is seen, with honeycombed changes (arrows).

(i) Inside the left rectangle, Elastic Masson stain (x200). The extracellular matrix of the alveolar interstitium has been replaced by fibrous tissue, which is seen as black bundle.

## Supplementary Figure 2

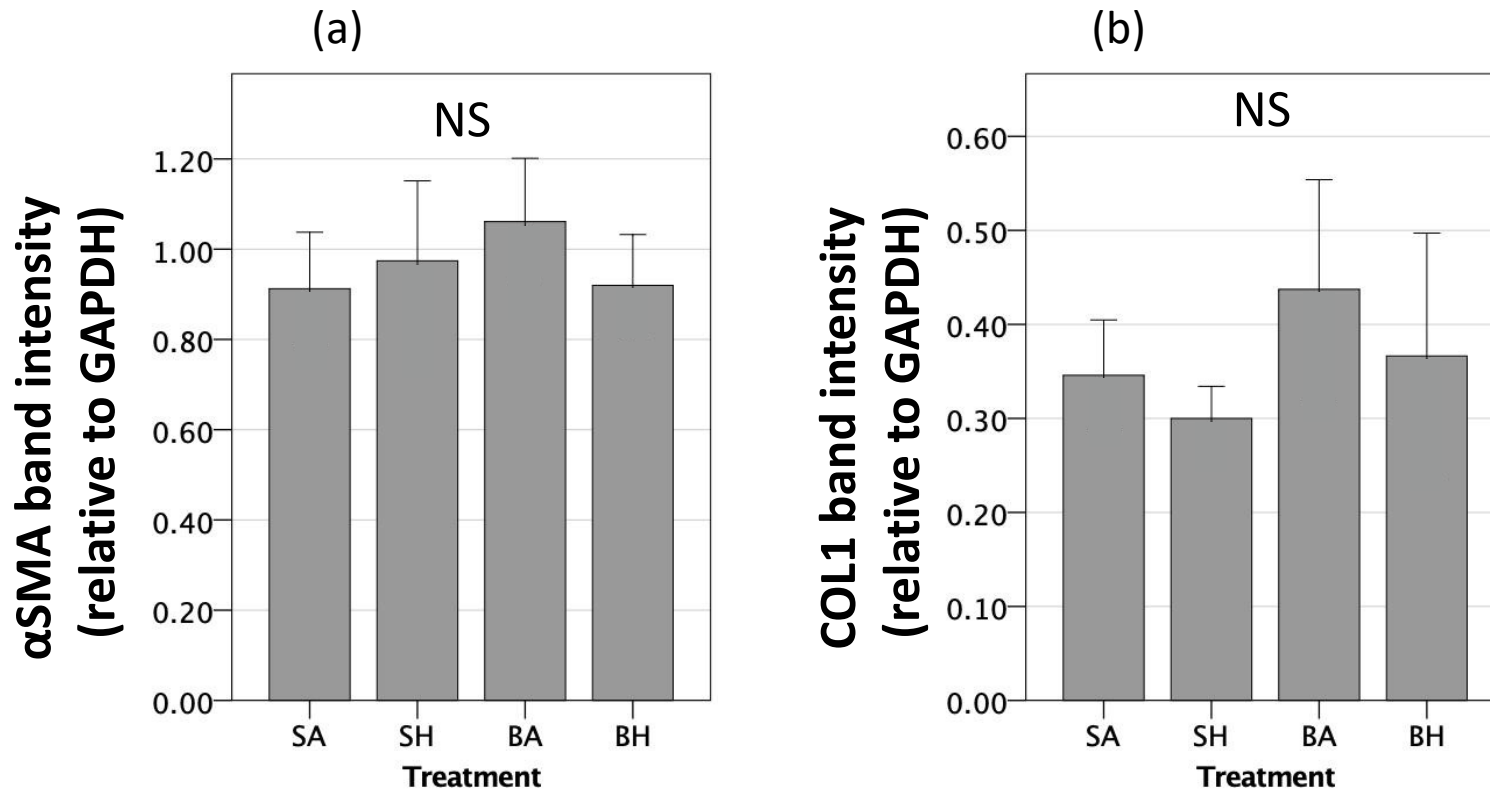

Western blotting densitometry of COL1 and  $\alpha$ SMA, which band images are shown in Figure 4. (a)  $\alpha$ SMA. There was no significant difference in the band intensity of  $\alpha$ SMA (relative to GAPDH) between treatment groups (SA 0.91[95%CI:0.79-1.04], SH 0.97[95%CI:0.8-1.15], BA 1.06[95%CI:0.92-1.2], BH 0.92[95%CI:0.81-1.03]). (b) COL1. There was no significant difference in the band intensity of COL1 (relative to GAPDH) between treatment groups (SA 0.35[95%CI:0.29-0.4], SH 0.3[95%CI:0.27-0.33], BA 0.44[95%CI:0.32-0.55], BH 0.37[95%CI:0.24-0.5]).
