# Supplementary material for: The effects of inhaling hydrogen gas on macrophage polarization, fibrosis, and lung function in mice with bleomycin-induced lung injury
Source: Springer Nature journal article supplement (doi:10.1186/s12890-021-01712-2), 2021-10-31
Supplement: MOESM2 [file 19816120]

# Supplementary Table 1

|                                                                 | Group | Intratracheal administration | Inhaled Gas         | Inhalation period | Mice, total | Excluded (humane endpoint) | N (Included in analysis) |                                                                                                                                                                                                                       |
|-----------------------------------------------------------------|-------|------------------------------|---------------------|-------------------|-------------|----------------------------|--------------------------|-----------------------------------------------------------------------------------------------------------------------------------------------------------------------------------------------------------------------|
| Mice<br>21 days after administration                            | SA    | Saline                       | Air                 | 21 days           | 6           | 0                          | 6                        | Respiratory physiological examination(Fig1)<br>Computed tomography(Fig2)<br>HE and E-M staining, histological scoring(Fig3)<br>Western blotting(Fibronectin, $\alpha$ SMA, COL1)(Fig4)                                |
|                                                                 | SH    | Saline                       | 3.2% H <sub>2</sub> | 21 days           | 6           | 0                          | 6                        |                                                                                                                                                                                                                       |
|                                                                 | BA    | Bleomycin                    | Air                 | 21 days           | 13          | 2                          | 11                       |                                                                                                                                                                                                                       |
|                                                                 | BH    | Bleomycin                    | 3.2% H <sub>2</sub> | 21 days           | 13          | 2                          | 11                       |                                                                                                                                                                                                                       |
| Mice<br>7 days after administration                             | SA    | Saline                       | Air                 | 7 days            | 12          | 0                          | 12                       | RT-PCR(Fig5),<br>-SA:12, SH:12, BA:28, BH:28<br><br>Western blotting, Immunostaining (TGF $\beta$ , IL6)(Fig6),<br>BALF assay(Figure 7-a,b)<br>Immunofluorescence (Iba-1, CD 163) (Fig8)<br>-SA:6, SH:6, BA:15, BH:15 |
|                                                                 | SH    | Saline                       | 3.2% H <sub>2</sub> | 7 days            | 12          | 0                          | 12                       |                                                                                                                                                                                                                       |
|                                                                 | BA    | Bleomycin                    | Air                 | 7 days            | 28          | 0                          | 28                       |                                                                                                                                                                                                                       |
|                                                                 | BH    | Bleomycin                    | 3.2% H <sub>2</sub> | 7 days            | 28          | 0                          | 28                       |                                                                                                                                                                                                                       |
| Mice<br>7 days after administration<br>(Additional experiments) | BA    | Bleomycin                    | Air                 | 7 days            | 10          | 0                          | 10                       | BALF cells RT-PCR (Fig 6-d)                                                                                                                                                                                           |
|                                                                 | BH    | Bleomycin                    | 3.2% H <sub>2</sub> | 7 days            | 10          | 0                          | 10                       |                                                                                                                                                                                                                       |
| Total                                                           |       |                              |                     |                   | 138         | 4                          | 134                      |                                                                                                                                                                                                                       |

| Termination method                   | Subjects                                                           | n   |
|--------------------------------------|--------------------------------------------------------------------|-----|
| CO <sub>2</sub> asphyxiation         | Euthanized for meeting humane endpoint, and excluded from analysis | 4   |
| Exsanguination under deep anesthesia | subject of analysis (before scheduled sampling)                    | 134 |

## Supplementary Table 2

| <b>Primer summary</b> |         |                           |
|-----------------------|---------|---------------------------|
| IL-6                  | Forward | GAGGATACCACTCCCAACAGACC   |
|                       | Reverse | AAGTGCATCATCGTTGTTCATACA  |
| IL-4                  | Forward | AGATGGATGTGCCAAACGTCCTCA  |
|                       | Reverse | AATATGCCGAAGCACCTTGGAAGCC |
| IL-13                 | Forward | TGAGGAGCTGAGCAACATCACACA  |
|                       | Reverse | TGCGGTTACAGAGGCCATGCAATA  |
| IL-10                 | Forward | CGGGAAGACAATAACTGCACCC    |
|                       | Reverse | CGGTTAGCAGTATGTTGTCCAGC   |
| COL1                  | Forward | ATCTCCTGGTGCTGATGGAC      |
|                       | Reverse | ACCTTGTTTGCCAGGTTTAC      |
| Fibronectin           | Forward | CGAGGTGACAGAGACCACAA      |
|                       | Reverse | CTGGAGTCAAGCCAGACACA      |
| RPL4                  | Forward | GCCAAGACTATGCGCAGGAAT     |
|                       | Reverse | GTAGCTGCTGCTTCCAGCTT      |

Supplementary Table 3

| <b>Antibody summery</b>            |                                      |               |
|------------------------------------|--------------------------------------|---------------|
| Target (Host, Class)               | Company, Catalog no                  | Dilution      |
| Fibronectin (Rabbit polyclonal)    | Proteintec 15613-1-AP                | 1:1,000 (WB)  |
| $\alpha$ SMA (Mouse monoclonal)    | Abcam ab7817                         | 1:3,000 (WB)  |
| COL1 (Rabbit polyclonal)           | Abcam ab34710                        | 1:2,000 (WB)  |
| TGF $\beta$ (Rabbit monoclonal)    | Abcam ab215715                       | 1:10,000 (WB) |
| $\beta$ actin (Mouse monoclonal)   | Sigma A5441                          | 1:10,000 (WB) |
| GAPDH (Mouse monoclonal)           | Proteintec 60004-1-Ig                | 1:5,000 (WB)  |
| Mouse IgG labeling HRP (Goat)      | Jackson ImmunoResarch<br>115-035-062 | 1:10,000 (WB) |
| Rabbit IgG I labeling HRP (Goat)   | Jackson ImmunoResarch<br>111-035-144 | 1:10,000 (WB) |
| TGF $\beta$ (Rabbit polyclonal)    | Abcam ab92486                        | 1:200 (IHC)   |
| IL-6 (mouse monoclonal)            | Abcam ab9324                         | 1:500 (IHC)   |
| Mouse IgG labeling biotin (Goat)   | Jackson ImmunoResarch<br>115-065-146 | 1:1,000 (IHC) |
| Rabbit IgG labeling biotin (Goat)  | Jackson ImmunoResarch<br>115-065-144 | 1:1,000 (IHC) |
| Iba-1 (Goat monoclonal)            | Abcam ab5076                         | 1:200 (IF)    |
| CD163 (Rabbit monoclonal)          | Abcam ab182422                       | 1:400 (IF)    |
| Goat IgG AlexaFlour 488 (Donkey)   | Abcam ab150133                       | 1:400 (IF)    |
| Rabbit IgG AlexaFlour 594 (Donkey) | Abcam ab150064                       | 1:400 (IF)    |
